# Supplementary material for: Yaobishu Regulates Inflammatory, Metabolic, Autophagic, and Apoptosis Pathways to Attenuate Lumbar Disc Herniation
Source: Oxid Med Cell Longev. 2022 May 14;2022:3861380. doi: 10.1155/2022/3861380 (PMC9125431; doi:10.1155/2022/3861380)
Supplement: Supplementary 1 — Supplementary Table 1: the MS qualitative analysis results of Yaobishu (YBS). [file 3861380.f1.txt]

Supplementary table 1. The MS qualitative analysis results of Yaobishu (YBS)
PeakID	Title	RT (min)	Precursor m/z	Area	Adduct ion name	Formula	Ontology	InChIKey	SMILES	Total score	MS1 isotopes	MSMS spectrum
281	Lysine	1.32385	147.111	33043.93359	[M+H]+	C6H14N2O2	D-alpha-amino acids	KDXKERNSBIXSRK-UHFFFAOYNA-N	NCCCCC(N)C(O)=O	84.2	146.71426:324 146.98781:324 146.98952:972 146.99123:324 146.99294:648 146.99808:648 146.99979:324 147.0032:324 147.0186:324 147.02544:324 147.02715:324 147.03058:324 147.034:324 147.07677:324 147.07848:648 147.08875:324 147.10243:324 147.10414:324 147.10585:972 147.10756:2268 147.10927:1620 147.11099:2268 147.1127:972 147.11441:648 147.11612:324 147.11783:648 147.11954:648 147.12125:324 147.12297…	84.08844:126 130.07565:126 130.08209:126 141.99702:126 147.13977:126
324	L-ARGININE	1.365117	175.1146	6101640.5	[M+H]+	C6H14N4O2	L-alpha-amino acids	ODKSFYDXXFIFQN-UHFFFAOYNA-N	NC(CCCN=C(N)N)C(O)=O	92	174.66306:1024 174.67796:512 174.67984:512 174.74696:512 174.76189:512 174.76749:512 174.78241:512 174.84955:512 174.88127:1024 174.88499:512 174.90179:512 174.91299:512 174.92046:512 174.92232:512 174.95964:512 174.98016:512 174.9839:512 174.98763:512 174.99323:512 174.9951:512 174.99696:1168 175.00816:1360 175.01003:1167 175.02122:512 175.03056:1128 175.03242:512 175.04362:1242 175.08095:1258 1…	53.19072:126 55.03161:126 56.04298:126 56.04826:126 56.48636:276 56.60836:256 59.86576:129 59.86685:129 59.87122:300 59.87558:129 59.89633:291 60.02742:298 60.05037:150 60.05256:468 60.05365:169 60.05474:642 60.05584:1949 60.05693:1341 60.05802:2364 60.05912:2852 60.06021:2134 60.0613:1333 60.0624:347 60.06349:1334 60.06458:658 60.06568:836 60.06677:164 60.06895:164 60.07114:174 60.07333:333 60.0…
421	Melezitose	1.37895	527.1485	239099.4375	[M+Na]+	C18H32O16	Oligosaccharides	QWIZNVHXZXRPDR-WSCXOGSTSA-N	OCC1OC(OC2C(O)C(OC2(OC3OC(CO)C(O)C(O)C3O)CO)CO)C(O)C(O)C1O	80.4	526.77283:501 526.77606:501 526.88287:501 526.8894:501 526.89264:501 526.90558:1020 527.04156:501 527.04486:501 527.09344:501 527.09991:501 527.11285:501 527.12256:4045 527.12579:2046 527.12903:2023 527.13226:2527 527.1355:4072 527.13879:7613 527.14203:12807 527.14526:13333 527.1485:15287 527.15173:14915 527.15497:12255 527.1582:8697 527.16144:3568 527.16467:2565 527.16791:2043 527.17114:1020 527…	130.06914:126 130.10294:126 130.10616:126 155.01128:126 177.08246:126 184.91481:126 194.02336:126 194.69205:126 203.54807:126 205.35139:126 222.99765:126 229.07196:126 237.02065:126 265.45676:126 266.94827:126 271.06912:126 279.84671:126 281.02322:126 281.02557:126 282.91833:126 283.00613:126 285.00079:126 320.99191:126 326.54593:126 335.05148:126 337.13342:126 341.57736:126 342.76471:126 345.284…
705	Valine	1.503933	118.0879	188244.1719	[M+H]+	C5H11NO2	Valine and derivatives	KZSNJWFQEVHDMF-UHFFFAOYNA-N	CC(C)C(N)C(O)=O	85.7	117.60395:512 117.77077:512 117.84734:512 117.91014:512 117.91167:512 117.91627:512 117.94385:512 117.95457:1024 118.04806:512 118.06339:512 118.06645:512 118.06798:512 118.06951:1550 118.07104:2574 118.07258:1024 118.07411:2574 118.07565:2588 118.07718:512 118.07871:1536 118.08025:3612 118.08178:9812 118.08331:12386 118.08485:7764 118.08638:2574 118.08791:2588 118.08945:2561 118.09098:2561 118.0…	118.07986:385 118.08905:129
736	Proline	1.513617	116.0683	2918654	[M+H]+	C5H9NO2	Proline and derivatives	ONIBWKKTOPOVIA-UHFFFAOYNA-N	OC(=O)C1CCCN1	80.4	115.60826:512 115.69474:1024 115.69626:1024 115.69778:2561 115.6993:1536 115.70081:1536 115.70233:2048 115.70385:1024 115.7084:1024 115.72661:512 115.72964:512 115.76759:512 115.77518:512 115.92096:512 115.95741:512 115.95893:512 115.96045:512 115.99236:1129 116.03035:512 116.03339:512 116.03795:1216 116.0425:512 116.04555:1150 116.05162:1217 116.05466:617 116.05922:617 116.06075:1321 116.06226:5…	53.04491:126 56.05901:257 56.06641:126 57.07121:126 67.73071:258 68.04688:260 68.04804:130 68.0492:262 68.05037:132 68.05153:260 68.0527:263 68.05386:129 68.05619:132 68.28448:266 69.14635:129 69.60461:126 69.84138:134 69.84255:528 69.84373:134 69.84609:134 69.84727:260 69.84963:134 69.85199:240 69.85906:256 69.86142:129 69.8626:535 69.87203:411 69.92865:390 70.05965:282 70.06084:1929 70.06202:17…
738	L-5-Oxoproline	1.513617	130.0461	370712.9375	[M+H]+	C5H7NO3	Alpha amino acids and derivatives	ODHCTXKNWHHXJC-VKHMYHEASA-N	OC(=O)[C@@H]1CCC(O)=N1	85.3	129.62814:512 129.63297:512 129.63779:512 129.64581:1043 129.6667:1024 129.6683:512 130.01233:1038 130.03645:533 130.04289:6257 130.04449:12085 130.04611:19979 130.04771:17863 130.04933:14065 130.05093:7398 130.05255:6300 130.05415:3717 130.05576:3141 130.05737:3689 130.05898:3165 130.06059:3152 130.06219:1066 130.06381:3774 130.06541:1043 130.06703:2673 130.07024:1079 130.07346:512 130.07668:164…	56.05796:126 66.03821:126 66.04739:256 70.07855:126 82.05956:252 82.06212:126 82.0634:378 83.06067:126 84.04456:147 84.04715:265 84.05103:269 84.07301:277 84.0769:716 84.07819:426 84.07948:1158 84.08078:555 84.08207:856 84.08337:416 84.08466:147 84.08595:434 84.08724:430 84.08854:278 84.08984:147 84.17912:143 85.00823:268 85.16178:126 85.60238:129 89.07755:257 130.05486:126 130.05647:126 130.0612…
771	L-Gln	1.523283	147.0733	371992.5938	[M+H]+	C5H10N2O3	Alpha amino acids	ZDXPYRJPNDTMRX-VKHMYHEASA-N	N[C@@H](CCC(O)=N)C(O)=O	87.8	146.60146:512 146.60487:1043 146.92619:512 146.94328:1038 147.0596:1067 147.06131:1569 147.06473:1556 147.06645:512 147.06816:7346 147.06987:10550 147.07158:17054 147.07329:18488 147.075:8513 147.07671:5304 147.07843:8021 147.08014:2674 147.08185:5441 147.08356:4237 147.08527:2160 147.08698:1080 147.08868:512 147.09039:1024 147.09383:1024 147.1058:555 147.10751:1024 147.10922:512 147.11093:2068 1…	56.04953:126 56.0527:252 56.05376:256 56.05587:126 56.05693:129 56.06327:129 56.06538:126 56.07066:126 56.90936:126 66.03709:129 70.07031:126 72.08623:126 82.05831:126 82.09666:283 83.01184:126 83.05684:293 83.06969:126 83.12756:284 83.13271:271 84.03683:167 84.03812:623 84.03941:1105 84.0407:1231 84.042:2565 84.0433:2202 84.04459:952 84.04588:1107 84.04717:972 84.04847:627 84.04976:759 84.05106:…
849	4-Aminobenzoic acid	1.57465	138.0507	495766.2813	[M+H]+	C7H7NO2	Aminobenzoic acids	ALYNCZNDIQEVRV-UHFFFAOYSA-N	NC1=CC=C(C=C1)C(O)=O	86.9	137.58699:512 137.60851:512 137.61182:512 137.61346:512 137.6234:512 137.63168:1045 137.92975:1043 138.01096:512 138.03748:2077 138.04245:530 138.0441:2101 138.04576:532 138.04742:7348 138.04907:13230 138.05074:18931 138.0524:20498 138.05405:19502 138.05571:8418 138.05737:2642 138.05902:2643 138.06068:2645 138.06233:2116 138.064:3182 138.06566:1587 138.06731:526 138.06897:530 138.07063:1025 138.0…	65.03674:126 78.02994:126 78.03867:126 79.03883:126 92.0472:126 94.05577:126 94.06261:126 94.08176:126 123.02083:126 137.6022:269 138.03943:126 138.04109:423 138.0444:1412 138.04607:700 138.04771:1248 138.04938:276 138.05104:827 138.05269:550 138.05766:424 138.05933:558 138.06097:281 138.06595:138 138.07092:136 138.43916:143 138.87607:138 140.20757:126
913	ADENINE	1.612467	136.0572	959525	[M+H]+	C5H5N5		GFFGJBXGBJISGV-UHFFFAOYSA-N	N=1C=NC2=C(N=CNC12)N	90	135.61818:1051 135.61983:496 135.62146:496 135.62311:496 135.62476:1518 135.63625:496 135.65433:496 135.96671:496 136.01772:1031 136.02264:1051 136.04898:555 136.05061:1051 136.05226:4329 136.05391:8756 136.05556:31662 136.05721:55002 136.05885:48741 136.06049:36651 136.06213:28281 136.06378:15233 136.06543:9884 136.06708:9191 136.06873:8172 136.07037:5426 136.07201:4943 136.07365:3328 136.0753:2…	65.01054:126 67.02557:126 67.02788:130 67.03019:126 67.0325:130 67.03828:261 67.04174:130 82.03535:384 92.01468:132 92.01739:132 92.0201:389 92.0228:132 92.02551:130 92.02686:126 92.02821:126 94.03384:389 94.04342:412 94.05436:286 94.06394:132 109.04509:400 109.05246:126 119.02003:143 119.02157:160 119.02311:291 119.02465:440 119.02619:1796 119.02773:1811 119.02927:1518 119.03081:1465 119.03234:4…
1193	PICOLINIC ACID	1.91015	124.0343	288621.3125	[M+H]+	C6H5NO2			O=C(O)c1ncccc1	85	123.68729:196 123.69043:196 123.75948:401 123.85523:405 124.01858:407 124.02958:218 124.03114:848 124.03271:6755 124.03429:10983 124.03586:10728 124.03743:9437 124.039:7765 124.04057:5060 124.04214:2908 124.04372:2111 124.04529:2288 124.04686:2104 124.04843:1049 124.05:1902 124.05157:209 124.05315:429 124.05472:1025 124.05629:1207 124.05786:392 124.05943:407 124.061:196 124.06258:196 124.06415:39…	124.02731:264 124.02888:931 124.03045:126 124.03202:257 124.03359:402 124.03516:134 124.03673:134 124.0383:268 124.03987:264 124.04459:134 124.04616:134 124.05716:134 124.0713:134 126.97153:126 128.22246:126 203.06743:126
1244	Guanosine-3',5'-cyclic monophosphate	1.92575	346.0461	207159.4531	[M+H]+	C10H12N5O7P	3',5'-cyclic purine nucleotides	ZOOGRGPOEVQQDX-UUOKFMHZSA-N	O[C@H]1[C@@H](O[C@@H]2COP(O)(=O)O[C@@H]12)N1C=NC2=C1NC(=N)N=C2O	89.8	346.03046:384 346.03571:951 346.03833:753 346.04095:3388 346.04358:5617 346.0462:10269 346.04883:9356 346.05145:7652 346.05408:5932 346.0567:2999 346.05933:2461 346.06195:1350 346.06458:951 346.0672:1345 346.06982:971 346.07245:384 346.07507:782 346.08032:199 346.08295:184 346.08557:738 346.09082:184 346.09344:184 346.09607:184 346.09869:384 346.10132:369 346.10394:184 346.10657:553 346.10919:553…	113.03043:126 122.09782:126 125.01762:256 135.01801:126 135.01964:390 135.02129:260 135.02457:390 135.02948:130 135.03111:263 135.04095:129 135.04587:126 135.8849:271 137.04509:267 149.03528:291 151.55685:285 151.63503:263 152.02962:126 152.03831:136 152.04005:273 152.04179:901 152.04353:1668 152.04527:744 152.04701:1788 152.04875:2385 152.05049:2097 152.05223:1046 152.05397:1356 152.05571:1034 1…
1305	3-Hydroxycinnamic acid	2.005783	165.0515	195153.9688	[M+H]+	C9H8O3	Hydroxycinnamic acids	KKSDGJDHHZEWEP-SNAWJCMRSA-N	OC(=O)\C=C\C1=CC(O)=CC=C1	84.1	165.02251:512 165.04607:1536 165.04788:6145 165.0497:8706 165.05151:6657 165.05331:8706 165.05513:3073 165.05695:3073 165.05876:2048 165.06056:1536 165.06238:2048 165.06419:2048 165.06601:512 165.06783:512 165.06963:512 165.07144:1024 165.07507:512 165.08051:512 165.08414:512 165.08595:512 165.08957:1536 165.0932:1024 165.09502:1024 165.10226:512 165.10588:512 165.12582:512 165.57573:512 165.6374…	65.0377:126 77.03477:126 91.04681:126 91.05086:126 94.03368:126 95.04874:252 119.07835:126 123.03626:126 123.03783:126 137.07294:126 137.0746:126 147.04225:126 147.04909:126 147.05423:126 147.05936:126 147.7496:126 165.07759:126
1347	Guanosine	2.09885	284.0923	2242841.25	[M+H]+	C10H13N5O5	Purine nucleosides	NYHBQMYGNKIUIF-UHFFFAOYNA-N	N=C1N=C(O)C=2N=CN(C2N1)C3OC(CO)C(O)C3O	82.1	283.72861:139 283.73099:139 283.75:139 283.75476:139 283.7619:139 283.77139:139 283.77853:139 283.78091:139 283.80942:278 283.90213:139 283.93301:139 283.96869:139 283.9877:139 283.99246:278 283.99484:311 284.00198:139 284.00909:139 284.01147:139 284.01385:278 284.021:139 284.02814:139 284.03525:139 284.04239:329 284.04477:139 284.06378:445 284.06616:1132 284.06854:542 284.07092:1107 284.0733:908…	54.86661:126 55.02242:126 57.03394:252 57.03927:126 57.04353:126 65.02073:126 71.00989:126 71.01464:126 71.01939:126 82.03785:126 82.04296:252 85.02385:126 86.82188:126 87.04943:126 93.40691:126 93.66068:126 103.04002:126 106.98651:126 107.52708:256 109.04501:264 109.04648:261 109.04942:126 109.05237:261 109.68529:126 110.0239:402 110.02538:399 110.02686:411 110.02834:549 110.02981:531 110.03129:…
1386	Isoleucine	2.24335	132.0991	1029532.438	[M+H]+	C6H13NO2	Isoleucine and derivatives	AGPKZVBTJJNPAG-UHFFFAOYNA-N	CCC(C)C(N)C(O)=O	82.3	131.67302:127 131.67464:506 131.67625:380 131.67787:506 131.67949:380 131.68111:506 131.68274:506 131.68436:127 131.68597:127 131.68759:253 131.68921:127 131.69406:127 131.69893:127 131.84792:127 131.85278:320 131.93703:317 132.07156:289 132.07481:293 132.08778:163 132.0894:194 132.09102:686 132.09264:1665 132.09427:7880 132.09589:30065 132.0975:52656 132.09912:57735 132.10075:42886 132.10237:298…	55.05479:126 55.06002:126 55.06526:126 56.05264:126 57.05625:126 57.05731:261 57.06051:126 57.06371:257 67.05087:258 69.06656:132 69.06773:664 69.0689:397 69.07008:266 69.07124:130 69.07242:261 69.07359:270 69.07594:135 69.07711:132 69.07945:132 69.08297:130 69.08649:130 69.09118:130 69.31533:132 71.07165:126 73.0994:268 83.839:126 84.27747:272 85.82568:271 86.05846:126 86.06239:264 86.08857:275 …
1462	Ephedrine	2.628533	166.1206	9867.80957	[M+H]+	C10H15NO	Phenylpropanes	KWGRBVOPPLSCSI-WPRPVWTQSA-N	CN[C@@H](C)[C@H](O)C1=CC=CC=C1	80.7	166.03879:85 166.0406:170 166.04242:595 166.04424:425 166.04607:170 166.04788:510 166.06061:85 166.06242:85 166.06424:170 166.06606:85 166.06787:340 166.06969:255 166.07152:85 166.07515:170 166.07878:85 166.0806:170 166.08243:85 166.08424:170 166.08606:85 166.08788:425 166.08969:170 166.09151:170 166.09697:85 166.1006:85 166.10242:85 166.10423:85 166.10606:85 166.11151:255 166.11333:85 166.11514:…	166.11411:126
1604	Indoleacetic acid	3.067967	176.0663	157572.9844	[M+H]+	C10H9NO2	Indole-3-acetic acid derivatives	SEOVTRFCIGRIMH-UHFFFAOYSA-N	OC(=O)CC1=CNC2=CC=CC=C12	84.6	176.02698:270 176.05507:134 176.05881:404 176.06068:1075 176.06255:1742 176.06442:6175 176.0663:8619 176.06816:4032 176.07004:4046 176.07191:2013 176.07378:1212 176.07565:270 176.07753:537 176.07939:945 176.08127:267 176.08315:274 176.08502:407 176.08688:134 176.08876:267 176.09064:134 176.0925:267 176.09438:401 176.09625:134 176.09811:134 176.10373:134 176.10748:267 176.11122:134 176.11497:401 1…	71.06821:126 72.84164:126 103.04153:126 103.05585:258 116.97119:126 116.98035:252 116.98492:126 117.02917:126 118.05545:126 121.05558:126 129.99861:126 130.05008:126 130.05652:126 130.05812:126 130.06616:126 131.06236:126 133.04175:258 133.0564:126 133.05965:126 135.03105:126 135.06876:126 147.0732:258 148.05344:258 148.06201:126 148.06374:126 148.06544:126 148.06717:263 148.06888:132 148.07231:1…
1618	L-Phenylalanine	3.0947	166.0826	2530868	[M+H]+	C9H11NO2	Phenylalanine and derivatives	COLNVLDHVKWLRT-QMMMGPOBSA-N	c1ccc(cc1)C[C@@H](C(=O)O)N	81.9	165.58295:139 165.58476:139 165.88081:139 165.97713:139 165.98804:139 166.02621:139 166.03348:139 166.03529:139 166.03893:139 166.04076:355 166.04257:139 166.04439:335 166.05165:362 166.05893:139 166.06438:371 166.06802:585 166.07166:655 166.07347:185 166.07529:1597 166.07712:7118 166.07893:28672 166.08075:58582 166.08257:85303 166.08438:63734 166.0862:40082 166.08801:23366 166.08984:10541 166.09…	77.03358:389 77.03482:393 77.03854:126 77.03978:263 77.0435:130 77.04597:130 77.05588:269 77.06331:256 78.57658:262 79.04749:132 79.04874:263 79.05:137 79.05125:395 79.05376:137 79.05501:129 79.05627:132 79.05752:267 79.06379:129 91.04955:524 91.05225:137 91.0536:259 91.05629:126 92.43049:126 93.0636:130 93.06496:256 93.06632:130 93.06768:130 93.06905:130 93.0704:129 93.07585:307 96.99516:130 102…
1658	Mefenamic_Acid	3.195567	242.0934	321794.5313	[M+H]+	C15H15NO2	Aminobenzoic acids	HYYBABOKPJLUIN-UHFFFAOYSA-N	CC1=C(C)C(NC2=CC=CC=C2C(O)=O)=CC=C1	83.3	242.0078:152 242.01657:152 242.01877:152 242.06706:308 242.06926:308 242.07364:921 242.07584:152 242.08023:152 242.08463:152 242.08681:152 242.089:2010 242.0912:6467 242.0934:12042 242.0956:8955 242.09779:5846 242.09999:3707 242.10217:2943 242.10437:1551 242.10657:459 242.10876:1086 242.11096:779 242.11316:468 242.11536:152 242.11754:466 242.11974:459 242.12193:304 242.12633:156 242.13072:304 242…	71.08475:126 108.04404:126 108.04552:126 108.05285:126 108.8653:126 110.12745:126 111.03088:257 112.03954:257 113.09624:126 113.99518:126 121.98854:126 122.05866:126 129.09286:126 130.07568:126 136.07881:126 137.04984:126 146.07732:126 168.08916:126 209.08386:126 214.07222:126 224.06483:126 224.07329:126 224.07539:126 224.07751:126 224.08595:126 224.10707:126 225.14944:126 241.34039:258 242.07294…
1829	Tryptophan	3.530033	205.0918	3324045	[M+H]+	C11H12N2O2	Indolyl carboxylic acids and derivatives	QIVBCDIJIAJPQS-UHFFFAOYNA-N	O=C(O)C(N)CC1=CNC=2C=CC=CC21	89.4	205.04326:393 205.04529:183 205.05336:429 205.05539:183 205.05942:183 205.06346:1241 205.0675:403 205.07356:215 205.07559:408 205.07761:1926 205.07962:3054 205.08165:5553 205.08366:4285 205.08569:8145 205.08771:29198 205.08972:62052 205.09175:96290 205.09377:83270 205.09579:54882 205.09781:35774 205.09982:25539 205.10185:12002 205.10387:11300 205.1059:10613 205.10791:8165 205.10994:5581 205.11195…	56.77528:126 91.04819:126 91.05222:126 95.08727:263 108.03671:257 114.83115:268 115.04289:284 115.04441:423 115.04592:568 115.04743:698 115.04895:559 115.05046:404 115.05197:126 115.05349:139 115.055:540 115.05803:142 115.06106:139 115.06257:142 115.06408:281 115.0656:139 115.52457:126 115.82196:268 116.04372:259 116.05284:281 116.05892:129 116.06197:275 116.06804:129 116.25962:129 116.86124:126 …
1864	Petunidin 3-galactoside	3.59315	479.1088	674082.5625	[M]+	C22H23O12	Anthocyanidin-3-O-glycosides	CCQDWIRWKWIUKK-UHFFFAOYNA-O	COC1=CC(=CC(O)=C1O)C1=C(OC2OC(CO)C(O)C(O)C2O)C=C2C(O)=CC(O)=CC2=[O+]1	84.2	478.97601:376 479.00378:184 479.01614:384 479.06555:374 479.07172:383 479.0748:376 479.07791:753 479.08408:776 479.08716:193 479.09024:1158 479.09332:1927 479.09644:3506 479.09952:7208 479.1026:13862 479.10568:13876 479.10876:19129 479.11188:15005 479.11496:8189 479.11804:7978 479.12112:3518 479.12421:2902 479.12732:1944 479.1304:1571 479.13348:1363 479.13657:1555 479.13965:576 479.14276:953 479.…	129.09608:126 130.04674:126 135.07191:126 147.11757:126 147.12613:126 149.12292:126 149.1436:126 150.41258:126 151.02916:126 151.06383:126 151.07249:126 151.08464:126 159.06143:126 169.12233:126 173.11575:126 179.06485:126 181.09425:256 185.00313:256 185.0108:129 185.02232:129 185.02425:126 196.98019:129 200.11696:126 201.11003:126 212.11797:126 215.10352:126 230.31418:126 245.05849:126 245.09604…
1923	CHLOROGENIC ACID	3.698483	355.0954	1832523.375	[M+H]+	C16H18O9	Quinic acids and derivatives	CWVRJTMFETXNAD-JUHZACGLSA-N	O=C(O)C1(O)CC(O)C(O)C(OC(=O)C=CC2=CC=C(O)C(O)=C2)C1	84	354.90671:230 354.96252:230 354.97049:230 354.97314:230 354.97845:230 354.99176:230 355.00769:230 355.01569:230 355.05554:691 355.0582:461 355.06085:691 355.06354:1657 355.06619:2175 355.06885:1007 355.0715:1312 355.07416:1279 355.07681:2062 355.07947:2539 355.08212:2307 355.08478:3863 355.08746:9461 355.09012:21346 355.09277:39077 355.09543:55671 355.09808:40821 355.10074:36021 355.10339:22089 3…	73.04753:126 73.04874:126 116.65845:126 117.01985:129 117.0229:129 117.02443:256 117.02596:126 117.03053:268 117.03206:126 117.04122:126 121.16254:256 132.01355:265 134.98499:256 135.02596:129 135.03087:129 135.03252:525 135.03415:269 135.0358:135 135.03743:928 135.03908:261 135.04071:397 135.04562:154 135.05547:134 140.0854:258 144.94733:126 145.01018:283 145.01187:307 145.01358:283 145.01527:28…
1936	dihydrocapsaicin	3.718667	330.2015	632359.25	[M+Na]+	C18H29NO3		XJQPQKLURWNAAH-UHFFFAOYSA-N	OC1=CC=C(C=C1OC)CN=C(O)CCCCCCC(C)C	80.5	330.09131:202 330.09387:403 330.09644:202 330.10156:202 330.10669:403 330.11438:202 330.11694:403 330.11951:403 330.12207:202 330.12463:1008 330.1272:1008 330.12976:806 330.13232:813 330.13489:815 330.13745:202 330.14258:403 330.14771:202 330.15027:403 330.15796:818 330.16052:202 330.16309:617 330.16821:413 330.1759:636 330.17847:220 330.18103:652 330.18359:426 330.18616:836 330.18872:1078 330.19…	116.06958:126 116.07414:126 130.05481:126 131.03804:126 132.09145:126 140.06378:126 144.07404:126 165.97972:126 168.05081:126 168.05629:126 180.08951:126 181.03163:126 187.13531:252 193.07549:126 197.10695:126 197.1228:126 197.13864:126 197.14459:126 203.08749:126 204.04356:126 204.08386:126 204.0899:126 219.36806:126 229.12538:126 233.12308:126 235.09811:126 255.06784:126 257.15164:126 283.93954…
1954	hydroquinidine	3.738967	349.2022	191708.7813	[M+Na]+	C20H26N2O2	Cinchona alkaloids	LJOQGZACKSYWCH-WZBLMQSHSA-N	OC(C=1C=CN=C2C=CC(OC)=CC21)C3N4CCC(C3)C(C4)CC	81	348.76218:229 348.78851:229 348.82803:229 348.97562:229 348.98352:458 348.98618:229 348.99408:229 349.00198:229 349.02307:229 349.0336:688 349.03625:458 349.03888:458 349.0415:229 349.04678:458 349.04941:458 349.05206:229 349.05469:229 349.05997:229 349.06525:229 349.06787:229 349.0705:229 349.07578:512 349.0784:688 349.08105:917 349.08368:458 349.08633:688 349.08896:688 349.09949:229 349.10477:2…	54.39315:126 54.39627:126 61.02852:126 69.03606:126 73.05839:126 73.06321:126 73.99588:126 76.9865:126 83.81702:126 88.04726:252 97.03819:126 111.07694:126 114.09307:126 114.09608:126 115.10036:126 125.05525:126 127.02707:126 127.0382:126 133.05623:126 133.09691:126 139.73:126 145.03737:126 149.05052:126 149.09187:126 151.1106:126 161.04781:126 161.53154:126 162.74406:126 163.27901:126 176.05521:…
1969	(E)-4-[(1R,2S,3S,4R,8aS)-2,3,4-trihydroxy-2,5,5,8a-tetramethyl-3,4,4a,6,7,8-hexahydro-1H-naphthalen-1-yl]but-3-en-2-one	3.764917	349.1758	3884547	[M+K]+	C18H30O4	Sesquiterpenoids	GUVJPXABQYFWPD-GSZDNMEJSA-N	O=C(C=CC1C(O)(C)C(O)C(O)C2C(C)(C)CCCC12C)C	80.1	348.71985:190 348.72247:190 348.7251:190 348.83051:190 348.84894:190 348.97281:190 348.98334:380 349.0018:190 349.00443:190 349.00705:190 349.01233:190 349.01761:190 349.02023:190 349.02814:190 349.03079:190 349.03607:380 349.04398:380 349.05188:571 349.0545:190 349.06241:190 349.07297:190 349.07822:761 349.08087:380 349.0835:1141 349.08615:380 349.08878:571 349.0914:571 349.09406:380 349.09668:1…	71.55896:126 85.0928:126 99.0357:126 114.09317:126 127.03672:126 127.05421:126 138.26648:126 141.01543:126 151.10031:126 153.27049:126 159.35165:126 163.02507:126 169.10406:126 169.10773:126 169.10956:126 169.1114:126 169.11507:126 179.85298:126 187.06012:126 187.12958:126 187.13344:126 188.0551:126 190.39545:126 190.96428:126 193.86632:126 205.08072:126 205.09082:126 205.10294:126 219.05481:126 …
2312	[(1S,2S,3R,5R,6S,8S)-6-hydroxy-8-methyl-3-{[(2S,3R,4S,5S,6R)-3,4,5-trihydroxy-6-(hydroxymethyl)oxan-2-yl]oxy}-9,10-dioxatetracyclo[4.3.1.0?,?.0?,?]decan-2-yl]methyl benzoate	4.2463	503.1463	9018380	[M+Na]+	C23H28O11	Terpene glycosides	YKRGDOXKVOZESV-RMNZJSDUSA-N	O=C(OCC12C3OC4(O)CC(O3)(C)C2(OC5OC(CO)C(O)C(O)C5O)CC41)C=6C=CC=CC6	86.6	502.66226:512 502.69705:512 502.70654:512 502.74765:512 502.76663:512 502.79828:512 502.81409:512 502.8204:512 502.82675:512 502.84888:512 502.85522:512 502.86472:512 502.94696:512 502.9628:512 502.96594:512 502.96912:512 502.97229:512 502.98492:512 502.9881:512 502.99127:512 503.00708:512 503.01974:512 503.02292:1148 503.0419:512 503.05139:1207 503.05453:512 503.07037:512 503.09567:512 503.10202…	56.75812:126 71.05364:126 81.03763:126 85.0184:126 86.37527:126 103.66795:126 107.08405:126 112.87561:126 117.71202:126 126.46943:126 129.09427:126 131.91939:126 132.09769:126 132.48712:126 133.0528:126 133.05443:126 133.06419:126 133.06908:256 133.68492:126 133.81871:126 134.05545:126 143.04272:126 145.01172:126 145.01682:256 145.01851:252 151.06534:126 155.32043:260 161.04942:256 163.05899:258 …
2370	7-methoxy-6-(1,2,3-trihydroxy-3-methylbutyl)chromen-2-one	4.348917	295.114	150113.625	[M+H]+	C15H18O6	Coumarins and derivatives	PCSZTTAMZGNQNB-UHFFFAOYSA-N	O=C1OC=2C=C(OC)C(=CC2C=C1)C(O)C(O)C(O)(C)C	82.1	295.09454:512 295.09698:512 295.10184:512 295.10425:1024 295.10666:5633 295.1091:7169 295.11151:7169 295.11395:10754 295.11636:4097 295.1188:4097 295.12122:3073 295.12363:1536 295.12607:2048 295.12848:1536 295.13092:1024 295.13333:512 295.13818:512 295.14059:512 295.15271:512 295.16:1536 295.16241:1024 295.17697:1024 295.17938:1024 295.18182:2561 295.18423:1536 295.18665:1536 295.18909:1024 295.1…	65.06066:126 111.03996:126 125.92778:126 149.05241:126 151.02406:126 162.02693:126 174.01537:257 175.02921:126 177.03944:126 188.04543:126 189.02364:126 189.02557:126 191.0208:126 191.02275:505 191.02859:126 191.04225:126 205.03421:256 205.0423:143 206.03534:129 206.03737:256 206.04344:643 206.04951:126 206.05559:383 207.04907:129 207.0511:126 212.06664:271 217.07568:256 219.05684:126 250.18645:1…
2483	7-O-beta-glucopyranosyl-4'-hydroxy-5-methoxyisoflavone	4.494283	447.1196	738888.6875	[M+H]+	C22H22O10		KSVVGBSBNPMXJF-RECXWPGBSA-N	O=C1C(=COC2=CC(OC3OC(CO)C(O)C(O)C3O)=CC(OC)=C12)C=4C=CC(O)=CC4	85.6	446.69611:512 446.71402:512 446.7468:512 447.04205:512 447.06891:1060 447.0719:512 447.07489:1045 447.07785:512 447.08383:512 447.08682:2100 447.08978:512 447.09277:3166 447.09576:547 447.09875:532 447.10172:5378 447.10471:2723 447.1077:5288 447.11069:11138 447.11365:18196 447.11664:36600 447.11963:39688 447.12262:36210 447.12558:25159 447.12857:18244 447.13156:7485 447.13455:5959 447.13751:5856 …	69.04205:126 75.03965:126 86.09521:126 103.68692:126 104.25224:126 120.07657:126 131.04941:126 132.09312:126 133.05147:126 137.01361:126 137.02351:126 147.05775:126 147.0629:126 148.06712:126 151.99471:126 162.11491:126 183.03398:126 186.05234:126 187.1064:126 187.11026:126 207.02065:126 207.02673:126 213.03741:126 213.04359:252 213.06418:252 213.13626:126 214.04962:126 214.05788:126 214.06613:12…
2534	(2R,3R,4S,5S,6R)-2-[6-hydroxy-3-[(E)-3-hydroxybut-1-enyl]-2,4,4-trimethylcyclohexyl]oxy-6-(hydroxymethyl)oxane-3,4,5-triol	4.53675	413.2072	576722.125	[M+Na]+	C19H34O8	Terpene glycosides	FPWYMVMNRFRHQC-BVWWHRDXSA-N	OCC1OC(OC2C(O)CC(C)(C)C(C=CC(O)C)C2C)C(O)C(O)C1O	80.5	413.08682:512 413.11548:1024 413.13556:512 413.13843:512 413.16138:512 413.16425:1550 413.16711:512 413.17285:512 413.17572:1040 413.17856:512 413.18143:1536 413.1843:1550 413.18716:512 413.1929:1565 413.19577:1552 413.19864:13957 413.20151:17694 413.20438:21702 413.20724:21749 413.21011:17706 413.21298:8798 413.21585:6291 413.21872:4625 413.22159:3646 413.22446:1552 413.22733:1551 413.23019:1552…	87.04164:126 122.02764:126 147.0407:126 151.10728:126 173.13068:126 173.14182:126 177.19527:126 179.13289:126 180.8609:126 184.52763:126 191.12416:258 203.03323:258 203.03525:132 203.03725:389 203.03926:126 203.04128:126 203.04529:132 203.05132:126 205.06451:126 229.13817:126 233.15536:132 247.03899:126 251.1424:126 253.15627:126 278.0206:126 301.09497:126 301.12192:126 313.16678:126 322.22119:25…
2557	7-hydroxy-2-[4-[(2S,3R,4S,5S,6R)-3,4,5-trihydroxy-6-(hydroxymethyl)oxan-2-yl]oxyphenyl]-2,3-dihydrochromen-4-one	4.579916	419.1246	128354.7969	[M+H]+	C21H22O9		DEMKZLAVQYISIA-UZQFATADSA-N	O=C1C2=CC=C(O)C=C2OC(C3=CC=C(OC4OC(CO)C(O)C(O)C4O)C=C3)C1	81.5	419.05237:390 419.0697:390 419.08124:791 419.08414:390 419.08704:390 419.10724:780 419.11014:390 419.11301:390 419.11591:8246 419.1188:2730 419.12167:9438 419.12457:16573 419.12747:10219 419.13034:9069 419.13324:7500 419.13614:4336 419.13901:1995 419.14191:2364 419.14481:2787 419.14767:1204 419.15057:1572 419.15344:780 419.15634:780 419.15924:390 419.16211:1182 419.16791:390 419.17368:780 419.176…	78.05222:126 83.08891:256 85.0303:126 85.0381:126 85.91457:126 88.41434:126 91.03742:126 109.01843:126 109.02727:126 109.03611:126 120.06873:126 120.07337:126 123.03628:256 127.03664:126 136.57625:256 137.01019:256 137.0135:257 137.01515:515 137.0168:388 137.01845:126 137.02011:260 137.02837:524 137.03166:126 137.08946:130 137.10599:129 137.799:129 145.04079:126 145.04929:126 145.05098:126 145.06…
3038	albiflorin	5.175967	503.1437	7428363	[M+Na]+	C23H28O11	Terpene glycosides	QQUHMASGPODSIW-ICECTASOSA-N	O=C(OCC12C(=O)OC3(C)CC(O)C2CC31OC4OC(CO)C(O)C(O)C4O)C=5C=CC=CC5	82.7	502.80789:1071 502.94394:512 503.03568:512 503.06418:512 503.09579:512 503.10214:1720 503.10532:1203 503.10846:629 503.11163:558 503.11481:3052 503.11795:4251 503.12112:3578 503.1243:6784 503.12744:5089 503.13062:17867 503.13379:51829 503.13693:102300 503.14011:160924 503.14328:197268 503.14645:205734 503.1496:136797 503.15277:81052 503.15594:49783 503.15909:32820 503.16226:25576 503.16544:22284 …	69.035:126 76.27405:126 101.65282:126 101.65567:126 112.31004:126 133.05794:252 137.06145:126 139.78844:126 161.05682:257 161.05861:256 167.04282:256 179.06105:126 179.06294:256 179.07805:256 179.07994:129 179.13469:126 185.02998:129 185.03191:256 185.03574:401 185.03958:129 197.06926:126 197.07521:256 197.10294:271 201.158:126 201.16:129 203.03717:269 205.05635:126 209.13284:256 214.74773:260 21…
3165	calycosin-7-O-beta-D-glucoside	5.457583	431.1265	1000927.313	[M+H]+	C22H22O9		MGJLSBDCWOSMHL-MIUGBVLSSA-N	O=C1C(=COC2=CC(OC3OC(CO)C(O)C(O)C3O)=CC=C12)C=4C=CC(OC)=CC4	82.6	430.71066:512 430.71942:1562 430.72528:512 430.76044:512 430.78677:512 430.80142:512 431.02399:1042 431.04449:512 431.04742:1066 431.06793:2093 431.08258:1043 431.09723:1046 431.10016:1024 431.10309:1093 431.10602:1046 431.10895:2113 431.11188:3222 431.11481:4243 431.11774:17658 431.12067:32429 431.1236:51692 431.12653:53889 431.12946:39714 431.13239:33388 431.13531:18757 431.13824:9675 431.14114…	95.28835:126 107.04933:126 109.9633:126 118.03399:126 118.04012:126 129.52614:126 135.03596:126 136.01479:126 136.02136:126 145.05794:126 151.04314:126 152.05215:126 158.95482:126 169.06009:126 170.05757:126 171.84303:126 177.13335:317 179.51076:126 188.29512:126 196.04095:126 197.04565:126 198.10852:126 208.02873:126 208.93312:126 212.96956:126 213.07869:126 213.08075:252 224.37979:126 225.07556…
3174	FORMONONETIN	5.462133	269.0729	129091.0391	[M+H]+	C16H12O4	4'-O-methylisoflavones	HKQYGTCOTHHOMP-UHFFFAOYSA-N	O=C1C(=COC2=CC(O)=CC=C21)C=3C=CC(OC)=CC3	87.9	269.01733:512 269.02426:512 269.06131:512 269.06592:512 269.06824:512 269.07056:4609 269.07288:7682 269.0752:8706 269.07751:7682 269.0798:5121 269.08212:3585 269.08444:2561 269.08676:3073 269.08908:1024 269.0914:1024 269.09369:1024 269.09601:512 269.09833:1024 269.10065:512 269.10757:512 269.10989:1024 269.11917:1024 269.12378:512 269.1261:4097 269.12842:1536 269.13074:4609 269.13306:4609 269.135…	67.05676:256 111.08305:126 124.03993:126 127.01611:126 133.06128:126 139.0423:126 145.09192:126 147.01675:126 172.10759:126 177.15024:126 182.06007:126 193.14418:126 206.04555:126 213.07869:126 226.04594:126 233.13177:126 237.03378:126 237.04465:126 237.0555:126 237.05984:126 237.86855:126 253.03297:252 253.03746:126 253.04195:126 254.0303:126 254.04155:259 255.22339:259 269.05225:133 269.05457:1…
4161	[1,3-dihydroxy-1-(7-methoxy-2-oxochromen-6-yl)-3-methylbutan-2-yl] (E)-2-methylbut-2-enoate	6.809017	377.1528	5784284	[M+H]+	C20H24O7	Coumarins and derivatives	GFMYIOGFYYHKLA-IZZDOVSWSA-N	O=C1OC=2C=C(OC)C(=CC2C=C1)C(O)C(OC(=O)C(=CC)C)C(O)(C)C	80.2	376.68716:512 376.89804:512 376.91174:512 376.91721:512 376.9227:512 376.92545:1024 376.92816:512 376.9364:512 376.93912:1024 376.96103:512 376.96652:512 376.96927:1173 376.98843:1187 377.0076:512 377.01855:512 377.03775:512 377.05966:1429 377.06512:512 377.09253:1259 377.09528:512 377.11444:512 377.11719:1625 377.12268:1637 377.1254:1182 377.12814:3550 377.13089:8309 377.13364:8591 377.13635:159…	53.05219:126 55.05701:129 55.06119:129 55.06329:126 55.06643:129 55.10726:126 56.97435:126 62.13904:126 64.55183:126 64.75374:126 83.04532:382 83.04789:126 83.05175:126 83.05432:126 83.06461:126 83.07104:126 91.04697:126 91.59702:126 91.97274:126 95.80547:126 103.05586:126 103.87954:126 105.73103:126 107.04205:126 115.04758:126 115.04909:126 115.05363:126 115.07178:126 116.0545:126 117.05972:126 …
4183	5-Methoxypsoralen	6.836216	217.044	132355.4219	[M+H]+	C12H8O4	5-methoxypsoralens	BGEBZHIAGXMEMV-UHFFFAOYSA-N	O=C1OC=2C=C3OC=CC3=C(OC)C2C=C1	84.5	216.91312:512 216.91519:512 216.91934:512 216.92143:512 217.0378:512 217.03989:2561 217.04196:4097 217.04404:9730 217.04611:6145 217.04819:6145 217.05028:1536 217.05235:1536 217.05443:1536 217.0565:2561 217.05859:1024 217.06482:1024 217.06689:1024 217.07521:1024 217.08145:512 217.09808:512 217.10016:1024 217.10223:512 217.10431:1024 217.12094:512 217.15213:1024 217.15421:512 217.15837:512 217.160…	69.06998:126 77.03841:126 83.04894:126 105.07323:126 155.07271:256 157.08542:126 161.04593:126 173.07104:126 174.02444:256 189.05832:126 189.06219:126 202.01114:126 202.02719:126 202.47659:126 217.01938:126 217.02562:256 217.02977:252 217.03185:505 217.03392:126 217.03601:126 217.03809:259 217.04016:129 217.04224:256 217.0464:126 217.05055:126 217.05472:129
4219	(Z)-3-(4-hydroxyphenyl)-N-[4-[[(E)-3-(4-hydroxyphenyl)prop-2-enoyl]amino]butyl]prop-2-enamide	6.863467	403.1571	65804.46875	[M+Na]+	C22H24N2O4	Coumaric acids and derivatives	PYVBFDCHJDMSMM-MFUUIURDSA-N	OC(=NCCCCN=C(O)C=CC1=CC=C(O)C=C1)C=CC2=CC=C(O)C=C2	83.6	402.71817:512 402.7663:512 402.79462:512 402.79745:1024 402.82294:1024 402.82861:512 402.84558:512 402.87106:512 402.88242:512 402.89374:512 402.91354:512 402.95038:512 403.02682:512 403.05798:512 403.07214:512 403.08914:512 403.1033:512 403.1203:512 403.12881:1024 403.13446:1024 403.14578:1536 403.14862:2048 403.15146:2048 403.1543:3073 403.15714:5633 403.15997:4609 403.16278:1536 403.16562:1536…	149.08496:126 211.12865:126 293.18198:126 300.06021:126 301.06296:126 301.08255:126 301.0899:126 311.06805:126 341.04254:126 342.67801:126 385.04312:126 385.04865:126 385.13446:126 402.9946:126 403.09656:126 403.10507:126 403.11639:126 403.11923:378 403.12207:126 403.12772:126 403.13339:126 403.15039:126 403.15887:126 403.16739:126 403.18436:126 403.19855:126 403.21271:126 403.21555:252 403.46204…
4347	Glycyrrhizin	7.068883	823.3995	372335.6563	[M+H]+	C42H62O16	Triterpene saponins	LPLVUJXQOOQHMX-QWBHMCJMSA-N	CC1(C)[C@H](CC[C@@]2(C)[C@H]1CC[C@]1(C)[C@@H]2C(=O)C=C2[C@@H]3C[C@](C)(CC[C@]3(C)CC[C@@]12C)C(O)=O)O[C@H]1O[C@@H]([C@@H](O)[C@H](O)[C@H]1O[C@@H]1O[C@@H]([C@@H](O)[C@H](O)[C@H]1O)C(O)=O)C(O)=O	81.2	823.27405:424 823.28619:424 823.32666:878 823.34283:866 823.35498:1713 823.3631:903 823.36713:1776 823.37122:864 823.37524:1345 823.37927:1772 823.38336:7884 823.38739:14127 823.39142:13718 823.39551:23606 823.39954:24894 823.40356:16429 823.40765:15923 823.41168:11464 823.41571:7485 823.41974:4008 823.42383:4430 823.42786:4444 823.43188:2658 823.43597:3110 823.44:885 823.44812:878 823.45215:866 …	85.03156:126 115.04736:126 128.57559:126 135.07181:126 141.01358:126 141.01526:126 141.0186:126 159.0275:126 161.65341:126 163.14017:126 171.11307:126 177.0392:126 177.04483:126 182.31876:126 189.14172:126 189.1456:126 189.14754:126 191.16292:126 199.1162:126 201.15785:126 205.13701:126 207.10973:126 211.13884:126 215.16124:126 217.14404:126 217.15028:126 218.3306:126 219.04199:126 219.16519:126 …
4391	Bergapten	7.202667	217.046	804204	[M+H]+	C12H8O4	5-methoxypsoralens	BGEBZHIAGXMEMV-UHFFFAOYSA-N	COC1=C2C=COC2=CC2=C1C=CC(=O)O2	83.3	216.91301:289 216.91508:441 216.91716:289 216.91924:447 217.00237:298 217.00652:289 217.00859:145 217.01691:299 217.02107:300 217.02937:918 217.03354:461 217.03561:762 217.03769:2930 217.03978:8005 217.04185:15747 217.04393:20435 217.04601:20845 217.04808:14386 217.05017:7982 217.05225:4179 217.05432:2307 217.0564:1857 217.05847:2472 217.06056:1854 217.06264:2009 217.06471:1077 217.06679:765 217.…	90.99153:126 101.05753:126 102.22235:126 117.05944:126 118.03526:126 118.03833:126 118.05212:126 121.09258:126 131.03949:126 131.04594:126 131.04918:126 131.05403:126 143.04785:126 143.27911:126 144.05185:126 145.01859:126 145.02539:126 146.03287:126 146.04311:126 155.06041:126 155.06569:126 156.01224:126 158.02748:126 161.04593:126 161.0513:126 161.06383:126 161.06741:126 170.10881:126 171.03741…
4689	Galangin	8.047367	271.09	161199.5938	[M+H]+	C15H10O5	Flavonols	VCCRNZQBSJXYJD-UHFFFAOYSA-N	O=C1C(O)=C(OC=2C=C(O)C=C(O)C12)C=3C=CC=CC3	81.2	270.85779:56 270.86243:114 271.07376:56 271.07608:115 271.07843:171 271.08075:227 271.08307:630 271.08539:2239 271.08771:3110 271.09003:4091 271.09235:3759 271.09467:2071 271.09698:866 271.09933:574 271.10165:523 271.10397:574 271.10629:405 271.10861:524 271.11093:520 271.11325:405 271.11557:346 271.11792:690 271.12024:805 271.12256:1417 271.12488:1963 271.1272:1174 271.12952:449 271.13184:357 27…	167.09572:126 168.04716:126 168.0618:126 174.0209:126 175.03104:126 183.02826:126 183.1237:126 184.03545:126 187.0273:126 197.08322:126 200.0352:126 201.04408:126 211.02023:126 211.05713:126 211.05917:126 211.06328:126 215.02083:252 215.03117:126 216.02322:126 225.07343:126 228.02277:252 228.03128:126 228.03554:258 229.02936:126 229.03577:126 229.0379:252 229.04004:126 229.06993:259 235.13928:256…
4727	Tris(1-chloro-2-propyl)phosphate	8.184317	326.9999	298420.9063	[M+H]+	C9H18Cl3O4P	Trialkyl phosphates	KVMPUXDNESXNOH-UHFFFAOYNA-N	CC(CCl)OP(=O)(OC(C)CCl)OC(C)CCl	83.4	326.83408:100 326.95908:48 326.97437:99 326.97693:104 326.98203:153 326.98459:258 326.98712:51 326.98969:210 326.99222:512 326.99478:2706 326.99734:4985 326.99988:8979 327.00244:8182 327.00497:4504 327.00754:3719 327.0101:3032 327.01263:1510 327.0152:1096 327.01773:1051 327.02029:671 327.02286:471 327.02539:779 327.02795:155 327.03049:359 327.03305:154 327.03561:156 327.04071:158 327.04324:145 32…	80.98826:258 94.78071:126 94.79856:256 96.47755:259 98.97242:129 98.97663:133 98.97803:678 98.97944:140 98.98084:534 98.98225:1100 98.98365:562 98.98505:129 98.98646:261 98.98786:272 98.99207:132 98.99908:132 139.99687:133 167.13202:256 174.97112:129 174.97485:531 174.97672:126 174.97859:540 174.98045:132 174.98232:404 174.98418:261 174.98605:132 174.98792:126 174.99165:129 174.99352:126 175.0028…
4860	imperatorin	8.634183	271.0904	550745.5	[M+H]+	C16H14O4		OLOOJGVNMBJLLR-UHFFFAOYSA-N	O=C1OC=2C(C=C1)=CC=3C=COC3C2OCC=C(C)C	85.2	270.94406:54 270.95334:115 270.9696:114 270.97888:54 270.9812:115 271.02765:113 271.03696:114 271.06714:60 271.06946:240 271.07178:442 271.07413:180 271.07645:434 271.07877:743 271.08109:1155 271.0834:3884 271.08572:7484 271.08804:15139 271.09036:16686 271.09268:13320 271.09503:9354 271.09735:5203 271.09967:4178 271.10199:2055 271.10431:2140 271.10663:1938 271.10895:511 271.11127:863 271.11359:93…	69.06889:265 69.07007:126 69.09117:126 81.19028:126 119.04765:126 131.04294:378 131.04456:643 131.05908:260 147.0287:126 147.03041:266 147.03212:266 147.03383:264 147.03554:385 147.03725:535 147.03896:396 147.04068:133 147.04581:133 147.05608:132 147.40698:133 149.79047:126 156.93542:134 157.02911:126 157.03618:132 158.51047:258 159.02953:126 159.03131:126 159.04021:126 162.12035:126 174.01357:25…
5046	(2S,6R,8aS)-6-(2-hydroxypropan-2-yl)-8a-methyl-4-methylidene-1,2,3,4a,5,6,7,8-octahydronaphthalen-2-ol	9.49915	261.1754	141695.9063	[M+Na]+	C15H26O2	Eudesmane, isoeudesmane or cycloeudesmane sesquiterpenoids	XZXBGGYJQALVAW-VSUHMYSYSA-N	OC1CC(=C)C2CC(CCC2(C)C1)C(O)(C)C	82.2	260.88135:59 260.88818:59 260.89047:59 260.92239:119 260.92465:891 260.92694:416 260.92923:178 260.93149:178 260.93378:238 260.93607:59 260.93832:119 260.9429:119 260.94516:119 260.98163:59 261.0386:59 261.05231:119 261.05457:59 261.06598:119 261.07281:119 261.07965:59 261.0842:59 261.12296:59 261.12753:59 261.12979:119 261.13437:59 261.13663:178 261.13892:598 261.1412:475 261.14346:361 261.14575…	93.07715:126 107.9707:126 149.12289:256 186.10231:126 201.15404:126 204.13019:126 261.13037:378 261.15317:510 261.16229:766 261.16455:129 261.16684:129 261.16913:126 261.17139:252 261.17368:129 261.17596:126 261.18051:128 261.1828:126 261.21017:126 261.23523:126 262.00879:126
5073	Pilocarpine	9.9407	209.1463	44988.4375	[M+H]+	C11H16N2O2	Alkaloids and derivatives	QCHFTSOMWOSFHM-WPRPVWTQSA-N	CC[C@H]1[C@@H](CC2=CN=CN2C)COC1=O	84.1	208.66507:66 208.88319:66 208.88522:66 208.88727:132 208.89339:66 208.89951:66 208.90765:66 208.94028:66 208.94232:66 208.95456:66 208.95863:66 208.98923:66 209.00351:198 209.00554:132 209.00758:66 209.00963:132 209.0137:66 209.01575:132 209.0239:198 209.02594:66 209.02798:132 209.03206:66 209.05858:66 209.07082:66 209.07286:66 209.07489:132 209.07693:66 209.07898:66 209.08101:66 209.0851:132 209…	82.94622:126 119.09064:126 165.06302:126 192.09253:126 209.11234:126 209.13681:126 209.14293:126 209.14905:252 209.15109:126 209.15721:126 209.15926:126 209.16333:126 209.19801:126
5083	(3E,12E)-3,12-dimethyl-8-methylidene-6,18-dioxatricyclo[14.2.1.0?,?]nonadeca-3,12,16(19)-triene-7,17-dione	10.16638	351.1693	8774.384766	[M+Na]+	C20H24O4	Diterpene lactones	KTYZKXFERQUCPX-SPUCVAIDSA-N	O=C1OC2C=C1CCC=C(C)CCC3C(=C)C(=O)OC3C=C(C)C2	83.2	350.97089:120 350.97351:239 350.97617:299 350.97879:359 350.98145:419 350.9841:120 350.98672:120 350.98938:179 350.992:120 350.99466:239 350.99731:60 350.99994:60 351.01053:60 351.01581:60 351.11362:60 351.11624:60 351.12418:60 351.12949:120 351.13211:60 351.13739:60 351.14005:60 351.1427:60 351.15854:60 351.16385:239 351.16647:60 351.16913:479 351.17178:658 351.17441:359 351.17706:299 351.17969:…	304.86917:126 350.9538:126 351.13882:126 351.15466:378 351.17847:126 351.21283:126 351.2287:126 588.36761:126 956.2229:126
466	L-(+)-Arginine	1.40005	173.1041	258395.1875	[M-H]-	C6H14N4O2	L-alpha-amino acids	ODKSFYDXXFIFQN-BYPYZUCNSA-N	N[C@@H](CCCNC(N)=N)C(O)=O	84.2	172.89066:201 172.89809:411 172.89993:409 173.09666:210 173.09851:208 173.10037:2688 173.10223:6804 173.10408:15301 173.10594:11201 173.1078:7029 173.10965:3526 173.11151:822 173.11337:1865 173.11522:628 173.11708:1246 173.11894:413 173.12079:622 173.12265:209 173.12451:822 173.12822:201 173.3548:209 173.65775:201 174.07635:201 174.08566:411 174.08939:201 174.10056:201 174.10242:201 174.10428:403…	112.10553:125 114.06367:125 131.09242:403 131.09404:675 131.09566:403 131.09727:562 131.09888:1219 131.10049:821 131.10211:409 131.10373:142 131.10535:267 131.10696:136 131.10858:136 131.1118:136 131.11342:130 131.11504:130 133.51718:125 173.12248:142 173.12434:136
581	Trehalose	1.44105	341.1114	2928587.75	[M-H]-	C12H22O11		HDTRYLNUVZCQOY-LIZSDCNHSA-N	OCC1OC(OC2OC(CO)C(O)C(O)C2O)C(O)C(O)C1O	84.1	340.77533:249 340.89255:556 340.94727:249 341.01501:577 341.02805:524 341.03326:784 341.04108:570 341.08017:249 341.08798:272 341.09058:320 341.0932:272 341.09579:2151 341.09839:2158 341.10101:4303 341.10361:15141 341.1062:43575 341.10883:95511 341.11142:125797 341.11404:97783 341.11664:51006 341.11923:29810 341.12186:17577 341.12445:9373 341.12708:7132 341.12967:5168 341.13226:4912 341.13489:456…	59.02289:129 59.02505:259 59.02614:256 59.02723:259 59.02831:259 59.03265:129 71.02418:129 71.02537:259 71.02894:252 71.03012:126 71.03131:126 71.05986:262 71.4076:126 71.74185:126 72.16915:126 81.04764:126 83.0247:126 85.04379:257 85.06201:126 89.03355:399 89.03489:130 89.03755:397 89.03888:136 89.04021:257 89.04154:262 97.04266:136 101.03608:126 101.03891:383 101.04033:126 101.04175:126 113.029…
642	Gluconate	1.471883	195.0523	601680.9375	[M-H]-	C6H12O7	Medium-chain hydroxy acids and derivatives	RGHNJXZEOKUKBD-SQOUGZDYSA-N	OC[C@@H](O)[C@@H](O)[C@H](O)[C@@H](O)C(O)=O	88.9	194.69186:344 195.00897:344 195.02473:705 195.03656:344 195.04247:344 195.04443:361 195.04642:3927 195.04839:12450 195.05035:24451 195.05232:30237 195.05429:21936 195.05626:11678 195.05824:3888 195.06021:2473 195.06218:2871 195.06415:2489 195.06612:1764 195.06808:1422 195.07005:356 195.07204:356 195.07401:1045 195.07597:360 195.07794:1067 195.0878:344 195.22577:344 195.27309:344 195.49202:344 195…	59.0218:126 59.02288:126 59.02505:256 59.03264:134 59.03698:258 75.01967:134 75.02089:256 75.02211:263 75.02333:397 75.02456:655 78.97271:132 78.97897:126 85.04246:129 87.02523:126 87.02918:126 89.03885:126 96.97451:126 96.97729:134 96.97868:126 96.98146:126 96.98563:126 96.9898:126 129.0312:252 129.03441:126 129.03601:126 129.03922:252 129.04402:258 129.05684:126 129.50285:126 131.26064:126 159.…
781	D-(+)-Malic acid	1.633217	133.015	436380.1875	[M-H]-	C4H6O5	Beta hydroxy acids and derivatives	BJEPYKJPYRNKOW-UWTATZPHSA-N	O[C@H](CC(O)=O)C(O)=O	84.5	132.52562:285 132.58572:285 132.58897:855 132.59061:1203 132.59386:872 132.59547:597 132.60036:285 132.60361:600 132.91412:285 133.00687:317 133.00848:929 133.01012:1871 133.01175:13752 133.01337:32895 133.015:38216 133.01663:21629 133.01825:17137 133.01988:8104 133.0215:4028 133.02313:4348 133.02477:1534 133.02638:2183 133.02802:2187 133.02965:1573 133.03127:1262 133.0329:630 133.03453:302 133.0…	59.02273:127 59.02382:254 59.0249:266 59.02815:276 70.80061:283 70.80774:269 71.02043:142 71.02162:288 71.02281:751 71.024:1047 71.02519:1942 71.02637:1455 71.02757:1330 71.02876:922 71.02995:281 71.03114:305 71.03233:139 71.03471:142 71.03589:156 71.03827:142 71.04184:142 71.15011:269 71.1513:142 71.3645:149 72.12343:286 72.34888:262 72.68052:270 73.00206:286 73.00327:817 73.00447:143 73.00568:9…
826	Fumaric acid	1.699217	115.0027	37808.10938	[M-H]-	C4H4O4	Dicarboxylic acids and derivatives	VZCYOOQTPOCHFL-UHFFFAOYSA-N	O=C(O)C=CC(=O)O	86.1	114.63686:278 114.92257:278 114.99973:555 115.00124:555 115.00275:3611 115.00426:3611 115.00578:3611 115.00729:1666 115.0088:1389 115.01031:833 115.01183:278 115.01334:278 115.01485:278 115.01637:278 115.0209:278 115.7302:278 115.82889:278 115.84255:278 115.84407:278 116.30316:278 116.39143:278 116.42036:278 116.69608:278 116.74181:278 116.77231:278 116.85923:278 116.92788:278 117.00876:278 117.0…	71.02296:125 71.02533:125
941	Citric acid	1.801367	191.0195	1945812.25	[M-H]-	C6H8O7	Tricarboxylic acids and derivatives	KRKNYBCHXYNGOX-UHFFFAOYSA-N	OC(=O)CC(O)(CC(O)=O)C(O)=O	89.9	190.62581:561 190.64139:531 190.66281:256 190.66672:256 190.73102:539 190.87134:558 190.90448:551 191.00392:305 191.00587:286 191.00978:601 191.01172:1408 191.01367:3823 191.01562:16109 191.01758:53952 191.01953:82144 191.02147:73931 191.02342:57149 191.02538:25713 191.02733:14579 191.02928:11673 191.03122:5529 191.03317:7375 191.03513:6014 191.03708:5016 191.03903:4666 191.04097:2943 191.04292:8…	57.04166:129 57.04273:129 57.0438:129 57.04486:398 57.04593:392 57.04699:256 57.05019:262 57.05339:133 61.49245:267 67.02679:129 67.02795:129 67.02911:259 67.03026:522 67.03142:129 67.03257:531 67.03373:129 67.03488:263 67.03603:259 67.03719:134 67.03951:134 67.92158:129 69.04488:279 70.35837:272 73.00077:129 73.00318:126 83.02443:126 85.03831:581 85.03962:749 85.04092:596 85.04222:749 85.04353:4…
1011	Aconitic Acid	1.927867	173.0095	137171.9844	[M-H]-	C6H6O6	Tricarboxylic acids and derivatives	GTZCVFVGUGFEME-IWQZZHSRSA-N	O=C(O)C=C(C(=O)O)CC(=O)O	84.4	172.97795:218 173.00578:1960 173.00764:3920 173.00949:7404 173.01135:6750 173.01321:5226 173.01506:1960 173.01692:871 173.01877:1089 173.02063:436 173.02249:871 173.02434:218 173.0262:218 173.03363:218 173.44591:218 173.45706:218 173.46263:218 173.52768:218 173.55185:218 173.58159:218 174.01128:436 174.01314:653 174.015:218 174.01686:218 174.0392:218 174.04292:436 174.07643:436 174.08202:218 174.…	85.03976:126 85.04366:126 111.01916:126 111.02362:252 129.03119:126 129.0376:126 155.02136:126
1032	Guanosine cyclic monophosphate	1.988533	344.0423	148370.875	[M-H]-	C10H12N5O7P		ZOOGRGPOEVQQDX-UUOKFMHZSA-N	O=P1(O)OCC2OC(N3C=NC=4C(O)=NC(=N)NC43)C(O)C2O1	89.2	343.89319:188 343.89841:382 343.90887:188 344.0188:188 344.02402:377 344.02927:565 344.03186:377 344.03448:758 344.03711:2270 344.03973:6626 344.04233:8717 344.04495:7379 344.04758:3404 344.0502:2270 344.0528:947 344.05542:758 344.05804:1140 344.06326:387 344.06589:188 344.07114:377 344.07376:377 344.0816:377 344.12085:188 344.2753:188 344.32242:188 344.57645:188 344.82269:188 345.00876:193 345.0…	57.0471:25 78.96883:25 79.97514:25 88.02443:25 89.04408:25 96.97025:25 96.97165:25 96.97304:50 96.97443:25 96.97581:25 96.9772:25 96.97998:25 96.98137:25 96.98554:25 98.05009:25 98.95477:25 98.96459:25 98.9674:25 98.97582:25 100.12321:25 101.54434:25 102.04118:25 103.93563:25 105.22276:25 105.30383:25 107.04855:25 107.05:25 108.03771:25 115.01663:25 118.06461:25 119.04942:25 132.60094:25 132.6074…
1045	L-5-Oxoproline	2.01385	128.0357	1438649.875	[M-H]-	C5H7NO3	Alpha amino acids and derivatives	ODHCTXKNWHHXJC-VKHMYHEASA-N	OC(=O)[C@@H]1CCC(O)=N1	85.9	127.67194:365 127.92715:360 127.97664:367 128.02133:198 128.02931:197 128.03091:1144 128.0325:6351 128.0341:19527 128.03571:32877 128.03729:30604 128.03889:17405 128.0405:10204 128.04208:6580 128.04369:2739 128.04529:2122 128.04688:3132 128.04848:1536 128.05006:579 128.05167:1559 128.05327:755 128.05486:388 128.05806:191 128.06125:169 128.18422:183 128.26891:198 128.36801:169 128.43996:197 128.61…	128.04411:140 128.04572:135 128.0473:140 128.0489:950 128.05051:945 128.05209:813 128.0537:416 128.0553:683 128.05688:413 128.05849:272 128.06009:140 128.06328:276 128.06647:136 128.06807:136 129.60559:135 141.96196:126
1104	GUANOSINE	2.19485	282.0866	278335.2813	[M-H]-	C10H13N5O5	Purine nucleosides	NYHBQMYGNKIUIF-UHFFFAOYNA-N	NC1=NC(=O)C2=C(N1)N(C=N2)C1OC(CO)C(O)C1O	81.9	281.91599:105 281.92783:217 282.03922:214 282.04395:213 282.04868:215 282.05106:217 282.05341:215 282.06528:214 282.06763:109 282.07239:221 282.07474:110 282.07712:326 282.0795:2405 282.08185:5272 282.08423:11534 282.08661:11911 282.08896:9108 282.09134:4071 282.09372:2426 282.09607:1423 282.09845:1216 282.1008:1095 282.10318:661 282.10556:110 282.10791:333 282.11029:440 282.11267:109 282.11978:1…	108.03775:126 114.07584:256 124.91489:126 131.06671:126 132.91962:126 133.03026:256 133.03189:259 133.03677:142 133.36409:126 150.05481:256 150.05653:681 150.05827:276 150.06:1349 150.06172:801 150.06519:547 150.06691:142 150.07037:133 150.0721:279 150.07382:142 150.07555:267 150.08073:133 151.20297:126 152.02129:126 164.07631:259 178.12837:267 281.95163:142 282.10327:256 282.10803:126 282.11038:…
1109	cis-Aconitate	2.20485	173.0098	178479.8125	[M-H]-	C6H6O6	Tricarboxylic acids and derivatives	GTZCVFVGUGFEME-IWQZZHSRSA-N	OC(=O)C\C(=C\C(O)=O)C(O)=O	87.6	172.99306:92 173.00235:92 173.0042:624 173.00606:2875 173.0079:8010 173.00977:10548 173.01163:9317 173.01347:4498 173.01534:2592 173.0172:1786 173.01904:1005 173.0209:813 173.02277:535 173.02461:535 173.02647:274 173.02832:549 173.03018:91 173.03204:91 173.03389:91 173.03575:198 173.09515:88 173.097:84 173.10814:84 173.39044:84 173.39973:84 173.42017:92 173.61905:84 173.63391:84 173.77711:84 173.…	67.03054:271 67.03285:126 84.76949:263 85.03732:273 85.03863:273 85.03992:716 85.04123:699 85.04253:980 85.04383:1117 85.04513:546 85.04643:409 85.04773:281 85.04903:426 85.05034:136 85.05164:273 85.05554:273 85.05684:136 85.77408:279 85.9676:136 86.31857:136 89.28008:136 111.01933:134 111.02229:386 111.02378:658 111.02527:390 111.03716:134 129.03136:126 129.03296:260 129.03456:389 129.03616:397 …
1153	L-Leucine	2.485	130.089	38232.71875	[M-H]-	C6H13NO2	Leucine and derivatives	ROHFNLRQFUQHCH-YFKPBYRVSA-N	CC(C)C[C@H](N)C(O)=O	80.1	129.63565:42 129.97325:169 129.97485:169 129.97646:424 129.97807:424 129.97968:169 129.98129:42 129.98289:42 130.0215:42 130.02312:216 130.02472:85 130.08266:129 130.08426:304 130.08588:1557 130.08748:1444 130.0891:1258 130.0907:523 130.09232:302 130.09392:218 130.09552:129 130.09714:88 130.09874:88 130.10196:87 131.31181:42 131.41046:42 131.42178:42 131.8994:42 131.95775:42 132.89301:42 132.9239…	61.99711:126 62.00489:126 130.09929:126 130.10411:126 130.11537:126
1211	Gallic acid	2.683167	169.0148	1778973.5	[M-H]-	C7H6O5	Gallic acids	LNTHITQWFMADLM-UHFFFAOYSA-N	OC(=O)C1=CC(O)=C(O)C(O)=C1	84.6	168.63164:62 168.64996:62 168.65913:62 168.93411:144 168.96162:162 168.9818:162 168.99831:209 169.00014:151 169.0038:82 169.00563:333 169.00748:463 169.00931:2939 169.01114:14132 169.01297:37903 169.01482:56675 169.01665:42642 169.01848:26349 169.02031:9778 169.02214:5459 169.02399:3643 169.02582:2943 169.02765:1656 169.02948:2109 169.03133:1883 169.03316:899 169.03499:594 169.03682:477 169.04599…	51.03324:126 51.03626:126 51.03727:126 51.03828:126 51.70982:126 53.05167:252 53.0527:126 55.02758:126 55.02863:126 55.02968:126 58.01565:126 58.16729:126 67.0292:126 69.04615:518 69.04967:126 69.0567:259 79.029:133 79.03026:525 79.03151:259 79.03277:259 79.03402:266 79.03528:398 79.03904:133 79.47368:133 80.97382:256 81.0424:126 81.04748:126 81.04874:259 81.05002:262 81.05637:126 81.06018:126 83…
1393	Piscidic Acid	3.273633	255.0523	1257890.375	[M-H]-	C11H12O7	Phenylpropanoic acids	TUODPMGCCJSJRH-UHFFFAOYSA-N	O=C(O)C(O)C(O)(C(=O)O)CC1=CC=C(O)C=C1	84.8	254.84276:178 254.9171:82 254.92612:82 254.93062:178 254.93964:82 254.9847:180 255.0275:174 255.03201:184 255.03877:189 255.04102:391 255.04327:1038 255.04553:2367 255.04778:10052 255.05003:25268 255.05229:34678 255.05453:32546 255.05679:21538 255.05905:8672 255.06129:5300 255.06355:3096 255.06581:1826 255.06807:2620 255.07031:1636 255.07257:760 255.07483:864 255.07707:198 255.07933:480 255.08159…	58.01571:126 58.01678:642 59.0282:259 69.04622:126 72.79493:257 73.00214:396 73.00335:133 73.00455:792 73.00576:394 73.00697:659 73.00817:130 73.00938:133 75.0257:133 76.04848:126 87.02518:133 91.75945:126 93.04527:130 93.05071:126 93.05344:126 99.02923:126 105.05209:130 106.0509:126 106.05236:256 106.05817:126 106.06108:509 107.06174:517 107.06612:256 107.06905:390 107.07197:126 119.06335:261 11…
1467	loganic acid	3.40545	375.1312	5554200	[M-H]-	C16H24O10		JNNGEAWILNVFFD-CDJYTOATSA-N	O=C(O)C1=COC(OC2OC(CO)C(O)C(O)C2O)C3C1CC(O)C3C	89.4	374.68045:211 374.77332:211 374.78699:211 374.89078:211 374.9017:211 374.9263:211 374.93723:211 375.00281:211 375.00827:422 375.01373:211 375.0192:422 375.0274:211 375.04926:211 375.05197:211 375.05472:211 375.05746:211 375.06564:632 375.06839:632 375.07111:1265 375.07385:1265 375.07657:1328 375.07932:1109 375.08478:422 375.08752:480 375.09024:1145 375.09299:211 375.0957:497 375.10117:520 375.103…	59.02088:126 59.02522:382 59.0263:126 59.02847:257 59.03064:384 59.04148:259 69.04298:130 69.04415:130 69.04532:132 69.04649:265 69.04767:395 69.04884:263 69.05001:133 69.05119:132 69.05235:130 69.05704:130 69.19548:132 71.02555:130 71.02673:126 73.04462:126 77.20734:126 85.04008:126 85.0531:126 87.02283:126 89.03376:129 89.03509:129 89.03642:126 89.03775:133 89.03909:133 89.04041:262 89.04175:12…
1509	Gentisic acid	3.452117	153.0224	58895.10547	[M-H]-	C7H6O4	Hydroxybenzoic acid derivatives	WXTMDXOMEHJXQO-UHFFFAOYSA-N	OC(=O)C1=C(O)C=CC(O)=C1	80.2	153.01152:188 153.01675:1506 153.01851:1130 153.02025:2824 153.022:1883 153.02374:1318 153.02548:377 153.02724:377 153.02898:565 153.03073:188 153.03421:188 153.0377:188 153.05516:188 153.0569:188 153.14944:188 153.58629:188 153.61076:188 154.022:188 154.02727:377 154.03076:188 154.54955:188 154.55305:188 155.24319:188 155.71648:188 157.69827:188	91.0407:125 108.03803:125 108.04097:125 109.04207:125 109.04649:125 109.04797:125 109.05386:125 121.05959:125 123.05651:125 123.05965:125 135.06281:125 135.06445:125 153.04103:125
1541	L-TRYPTOPHAN	3.58545	203.083	264697.9063	[M-H]-	C11H12N2O2	Indolyl carboxylic acids and derivatives	QIVBCDIJIAJPQS-VIFPVBQESA-N	N[C@@H](CC1=CNC2=CC=CC=C12)C(O)=O	93.1	203.07491:96 203.07692:472 203.07893:2555 203.08095:6739 203.08296:9034 203.08496:8555 203.08698:5410 203.08899:2940 203.091:856 203.093:950 203.09502:761 203.09703:664 203.09904:285 203.10106:379 203.10306:475 203.10507:189 203.10709:186 203.1091:95 203.11916:96 204.0271:95 204.03516:91 204.05934:91 204.06943:91 204.07547:91 204.0795:91 204.08151:274 204.08353:558 204.08554:731 204.08757:731 204…	74.03677:126 74.03799:256 79.96656:126 116.05888:254 116.06191:254 116.06344:256 116.06496:378 116.06647:259 116.06799:385 116.06952:126 116.07104:129 116.07256:126 116.0756:128 116.14554:126 141.62621:126 142.08163:126 142.08499:378 142.08669:126 142.09004:129 142.09677:258 159.10646:126 159.10823:252 159.11002:129 184.9689:126 203.02121:126 203.08755:132 203.09761:132 203.10164:126 203.10565:25…
1621	Caffeoyl quinic acid (isomer of 831, 833, 834)	3.713617	353.0887	4723423.5	[M-H]-	C16H18O9	Quinic acid and derivatives	CWVRJTMFETXNAD-UHFFFAOYNA-N	O=C(OC1CC(O)(C(=O)O)CC(O)C1(O))C=CC=2C=CC(O)=C(O)C=2	83.8	352.88455:191 352.91373:191 352.93228:191 352.93494:191 352.94818:191 352.96143:191 352.96674:460 352.98529:191 353.01181:435 353.0224:433 353.04626:449 353.04892:424 353.05951:414 353.06216:275 353.06482:519 353.06747:1168 353.07013:710 353.07278:1638 353.07544:2281 353.07806:3195 353.08072:10188 353.08337:31629 353.08603:80421 353.08868:139962 353.09134:128146 353.09399:89886 353.09665:50660 35…	71.02448:256 71.02686:126 73.06766:126 85.03891:126 85.04152:126 85.04542:126 85.04672:257 85.05583:126 87.0177:130 87.02033:256 87.02296:130 87.02692:261 87.02823:129 87.03349:129 89.58862:130 89.90007:129 91.05432:126 93.04977:126 99.05774:126 101.04919:126 107.06217:126 111.02409:126 127.05025:126 127.05185:126 127.05821:509 127.0598:126 134.04985:126 134.05966:126 134.6468:126 135.05809:257 1…
1738	Hydroxyferulic acid	3.834267	209.0455	2203528	[M-H]-	C10H10O5	Hydroxyferulic acid and derivatives	YFXWTVLDSKSYLW-UHFFFAOYSA-N	O=C(O)C=CC1=CC(O)=C(O)C(OC)=C1	85.1	208.74373:140 208.91296:307 208.92316:310 208.93335:140 208.96599:300 208.96803:301 208.97006:307 208.99251:297 209.02718:157 209.03127:652 209.03331:492 209.03534:161 209.03738:642 209.03943:2109 209.04146:8188 209.0435:37625 209.04555:67579 209.04758:64730 209.04962:42487 209.05167:20594 209.05371:12721 209.05574:9249 209.05779:4095 209.05983:3926 209.06186:2809 209.0639:3127 209.06595:1992 209…	58.26426:126 58.84083:257 59.02172:132 59.0228:130 59.02389:132 59.02497:130 59.02606:263 59.02714:382 59.02822:262 59.02931:260 59.03148:132 59.03256:129 65.05247:261 92.75288:257 93.04391:261 93.04527:132 93.04664:130 93.048:126 93.04936:261 93.05072:130 93.05208:130 93.05344:130 93.21957:130 95.0857:126 107.05883:126 107.06905:252 117.05035:126 119.06334:252 119.06488:257 119.06642:129 119.067…
1897	Caffeic acid	4.12475	179.0356	273026.125	[M-H]-	C9H8O4	Hydroxycinnamic acids	QAIPRVGONGVQAS-RQOWECAXSA-N	OC(=O)\C=C/C1=CC(O)=C(O)C=C1	93	178.63939:387 178.68466:190 178.78275:190 178.97523:190 178.97713:190 179.00356:190 179.00545:387 179.01299:190 179.02432:387 179.02809:577 179.02998:1753 179.03188:4632 179.03375:10071 179.03564:12999 179.03754:8318 179.03943:5208 179.04131:3106 179.0432:1547 179.04509:1372 179.04698:782 179.04886:1937 179.05075:592 179.05264:1169 179.05452:388 179.05641:190 179.0583:393 179.0602:570 179.06207:1…	65.0493:126 79.07076:126 107.06789:257 109.04359:126 117.04762:126 134.04973:126 134.05136:391 134.05299:126 134.05626:285 134.05789:435 134.05952:156 134.06116:268 134.62703:126 135.05304:158 135.05469:142 135.05632:394 135.05797:990 135.0596:2150 135.06125:2128 135.06288:2095 135.06451:1678 135.06616:773 135.06779:456 135.06944:943 135.07272:651 135.07436:514 135.07928:178 135.08092:300 135.084…
2223	Liquiritin	4.622733	417.1231	5216052.5	[M-H]-	C21H22O9	Flavonoid O-glycosides	DEMKZLAVQYISIA-UHFFFAOYNA-N	OCC1OC(OC2=CC=C(C=C2)C2CC(=O)C3=C(O2)C=C(O)C=C3)C(O)C(O)C1O	92	416.75717:212 416.76581:212 416.78308:476 416.79749:212 416.80902:212 416.82053:724 416.93576:513 416.9473:212 416.9617:497 417.03949:489 417.08273:492 417.0856:212 417.08847:537 417.09424:523 417.09714:265 417.10001:2126 417.10291:1649 417.10577:1125 417.10864:4390 417.11154:12982 417.11441:34305 417.11731:84621 417.12018:140974 417.12308:151990 417.12595:123821 417.12881:67263 417.13171:44682 4…	88.77571:270 91.02866:125 91.03944:125 118.68218:125 119.05755:129 119.05909:252 119.06063:145 119.06217:413 119.06371:960 119.06525:922 119.06679:1109 119.06833:1094 119.06987:423 119.0714:267 119.07294:145 119.07603:127 119.07757:479 119.08064:145 119.08218:133 119.55999:134 119.69889:326 119.96302:125 120.09442:133 120.36053:259 121.04728:273 122.50315:258 134.58943:125 134.59108:264 134.59435…
2455	3-Hydroxy-4-methoxycinnamic acid (isoferulic acid)	4.89155	193.0501	306732.5938	[M-H]-	C10H10O4	Hydroxycinnamic acids	QURCVMIEKCOAJU-HWKANZROSA-N	COC1=CC=C(\C=C\C(O)=O)C=C1O	88	192.71104:199 192.78157:404 192.80312:199 193.01477:199 193.02457:405 193.0383:199 193.04025:199 193.04417:411 193.04614:1613 193.0481:5651 193.05006:13700 193.05202:11937 193.05399:9736 193.05594:5650 193.05791:2019 193.05986:2007 193.06183:1624 193.06378:1016 193.06575:405 193.06966:814 193.07162:1197 193.07358:206 193.0775:199 193.07947:199 193.60527:199 193.7545:205 194.03349:199 194.04922:39…	133.03737:126 133.04062:126 133.0455:382 133.04713:824 133.05038:126 133.05202:126 133.05527:152 133.99605:126 134.01729:261 134.04669:150 134.04832:431 134.04996:129 134.05159:743 134.05322:1896 134.05486:1886 134.05649:734 134.05812:872 134.05977:278 134.0614:152 134.06303:411 134.06467:152 134.0663:594 134.06793:126 134.06956:272 134.07283:152 134.07446:303 134.11694:126 134.28368:146 135.2123…
2477	9-(2,3-dihydroxypropoxy)-9-oxononanoic acid	4.94905	261.1345	69228.67188	[M-H]-	C12H22O6		BQRISQXLSXCXSC-UHFFFAOYSA-N	O=C(O)CCCCCCCC(=O)OCC(O)CO	82.5	261.00201:235 261.0271:235 261.03165:235 261.03394:235 261.03622:704 261.03848:939 261.04077:470 261.04306:235 261.04761:235 261.05219:235 261.07498:235 261.07724:470 261.07953:235 261.08182:470 261.10461:235 261.116:235 261.12057:235 261.12741:470 261.1297:1174 261.13196:2582 261.13425:4695 261.13654:5165 261.13882:2582 261.14108:1643 261.14337:939 261.14566:1409 261.15021:470 261.1525:235 261.1…	125.10776:126 125.11092:388 125.1125:259 125.11407:511 125.11565:634 125.1188:256 125.12038:126 128.5688:126 134.05467:126 134.0563:129 134.06284:126 149.08368:252 169.1086:256 169.11043:126 169.11594:126 169.12878:126 175.04997:126 175.05931:129 175.06117:385 175.06303:126 176.1232:126 178.04782:258 180.34276:126 186.51324:256 187.10918:133 187.11304:258 187.11496:266 187.1169:650 187.11882:391 …
2497	3,5-Dicaffeoylquininic acid	4.964383	515.1241	2606361	[M-H]-	C25H24O12	Quinic acids and derivatives	KRZBCHWVBQOTNZ-UHFFFAOYNA-N	OC1C(CC(O)(CC1OC(=O)C=CC1=CC(O)=C(O)C=C1)C(O)=O)OC(=O)C=CC1=CC(O)=C(O)C=C1	82	514.65668:159 514.65991:159 514.92242:349 514.98004:159 514.99603:159 515.01208:159 515.01526:355 515.03448:159 515.04407:159 515.06647:340 515.08252:319 515.08893:333 515.0921:385 515.09534:212 515.09851:543 515.10175:614 515.10492:1510 515.10809:1993 515.11133:4791 515.1145:11237 515.11774:29482 515.12091:49460 515.12415:62364 515.12732:54476 515.13055:41337 515.13373:27219 515.13696:19056 515.…	52.5486:126 93.04428:126 93.06197:126 109.04074:126 111.05083:126 118.12643:126 119.06376:126 121.04889:259 132.66319:126 133.63033:126 134.62389:259 135.05644:133 135.05809:263 135.05972:651 135.06137:133 135.063:919 135.06465:392 135.06628:257 135.06793:389 135.06956:133 135.44536:278 136.80353:133 145.04218:126 155.05176:133 155.05351:130 155.05878:267 155.09216:126 157.0506:126 161.04013:126 …
2530	trans-4-Hydroxy-3-methoxycinnamate	5.070717	193.0518	382611.5313	[M-H]-	C10H10O4	Hydroxycinnamic acids	KSEBMYQBYZTDHS-HWKANZROSA-N	COC1=C(O)C=CC(\C=C\C(O)=O)=C1	83.5	193.03809:207 193.04005:207 193.04201:202 193.04398:207 193.04593:1027 193.0479:4452 193.04985:8996 193.05182:11587 193.05377:10343 193.05573:4877 193.05769:2907 193.05965:1349 193.06161:720 193.06357:515 193.06554:1024 193.06749:731 193.06946:206 193.07141:311 193.07338:208 193.07533:203 193.0773:105 193.0871:207 193.08907:99 193.09102:99 193.45784:99 193.45981:99 194.02739:99 194.04704:202 194.…	58.06012:127 89.05382:259 117.04311:260 117.04769:127 117.05533:260 121.04109:127 121.04886:127 133.04697:127 133.0486:652 133.05673:144 133.63516:269 134.04654:132 134.0498:424 134.05144:546 134.05307:1109 134.0547:1782 134.05634:1101 134.05797:832 134.0596:972 134.06123:413 134.06287:279 134.0645:133 134.06615:138 134.06778:134 134.07431:132 134.54691:142 134.70079:138 135.62436:127 136.05194:1…
2669	Flavanone + 2O, O-Hex	5.328367	417.1234	756135	[M-H]-	C21H22O9	Flavanone O-glycosides	DEMKZLAVQYISIA-UHFFFAOYNA-N	O=C3C=4C=CC(O)=CC=4(OC(C2=CC=C(OC1OC(CO)C(O)C(O)C1(O))C=C2)C3)	82.4	417.04559:83 417.07727:83 417.08594:83 417.08881:343 417.09457:90 417.09744:91 417.10034:281 417.10321:177 417.10611:457 417.10898:1103 417.11188:2283 417.11475:4332 417.11761:12919 417.12051:16574 417.12338:19197 417.12628:14995 417.12915:7103 417.13205:3214 417.13492:2280 417.13779:1833 417.14069:1376 417.14355:639 417.14645:826 417.14932:544 417.15222:276 417.15509:186 417.16663:96 417.16949:9…	119.06236:126 119.06852:252 119.08237:126 120.03741:256 135.02216:129 135.02379:252 135.02542:259 135.02707:126 135.03035:129 135.03198:126 135.03363:129 135.03526:129 135.03691:393 138.4308:129 143.09294:257 148.02968:126 148.03139:130 148.03311:130 148.03482:252 148.03654:397 148.03825:130 148.04169:126 148.71201:126 173.34807:130 183.05908:126 184.63557:126 186.57906:126 195.13811:276 211.1064…
2747	Formononetin-7-O-glucoside	5.4572	475.1273	1195435.25	[M+FA-H]-	C22H22O9	Isoflavonoid O-glycosides	MGJLSBDCWOSMHL-UHFFFAOYNA-N	COC1=CC=C(C=C1)C1=COC2=C(C=CC(OC3OC(CO)C(O)C(O)C3O)=C2)C1=O	82.5	474.66611:93 474.85059:204 474.94897:93 474.97052:201 475.01355:93 475.01663:93 475.01971:93 475.02893:93 475.04123:201 475.06277:93 475.08121:186 475.09045:213 475.09967:217 475.10275:120 475.1058:216 475.10889:1099 475.11197:1629 475.11505:2869 475.11813:8490 475.12119:16833 475.12427:30193 475.12735:38297 475.13043:36760 475.13348:21087 475.13657:12963 475.13965:7931 475.14273:5574 475.14581:3…	113.00294:126 125.03699:126 125.72112:126 128.28603:126 133.03581:126 135.33226:297 143.05251:126 155.92993:126 162.06259:126 169.67641:126 193.07996:126 209.07973:300 217.10214:256 223.05945:382 224.07214:256 252.05777:129 252.06224:129 252.06448:553 252.06673:126 252.06897:129 252.07121:259 252.07344:259 252.08241:195 252.08913:324 253.68002:129 261.13919:331 266.25107:288 267.07596:145 267.078…
3209	Acacetin	5.921834	283.0619	416750.7188	[M-H]-	C16H12O5		DANYIYRPLHHOCZ-UHFFFAOYSA-N	O=C1C=C(OC=2C=C(O)C=C(O)C12)C=3C=CC(OC)=CC3	86.7	282.83878:357 282.85065:357 283.04291:357 283.05478:357 283.05716:3213 283.05951:6426 283.06189:12137 283.06427:8924 283.06665:7140 283.069:2142 283.07138:1785 283.07376:1428 283.07614:357 283.07852:357 283.08087:1071 283.12836:357 283.17584:357 283.18298:357 283.46323:357 284.05029:357 284.05743:357 284.06458:714 284.06696:1785 284.06934:1785 284.07172:357 284.0741:714 284.07645:357 284.97134:35…	61.9963:126 62.00518:252 62.00629:261 111.0657:126 132.03821:126 135.02364:126 137.04128:126 143.06917:126 143.8432:126 145.04214:126 146.98244:126 146.98415:126 146.98758:126 148.03123:126 148.03467:126 148.03639:126 156.07774:126 160.03177:126 160.03891:382 161.04008:126 166.03464:126 183.0322:257 184.07216:257 184.07599:391 184.0779:383 195.05518:126 196.07533:130 211.06114:130 211.06319:517 2…
3585	FA 18:1+3O	6.6413	329.2354	2263024.5	[M-H]-	C18H34O5	Oxidized fatty acids	MDIUMSLCYIJBQC-UHFFFAOYNA-N	O=C(O)CCCCCCCC(O)C=CC(O)C(O)CCCCC	80.8	328.87711:111 329.00763:111 329.02298:111 329.03064:111 329.04089:111 329.04602:111 329.10742:111 329.12024:111 329.1228:253 329.14072:111 329.14328:111 329.1535:111 329.15863:111 329.16119:221 329.16632:221 329.17145:111 329.17398:626 329.18423:111 329.18936:253 329.20215:488 329.20471:261 329.2124:534 329.21497:411 329.2175:397 329.22006:1217 329.22263:1248 329.22519:5433 329.22775:12902 329.23…	61.00261:126 71.06366:126 92.90279:126 99.09281:126 113.07478:126 124.10451:126 125.12046:126 125.12993:126 127.12502:126 127.1282:126 127.12978:126 127.13138:126 127.13934:126 127.14252:258 129.11183:382 136.48685:126 138.68645:126 139.12216:126 139.12715:389 139.12881:132 139.13048:256 139.13214:261 139.13713:261 139.14047:126 140.08578:126 140.81152:126 148.95461:259 149.15788:129 155.16423:26…
4013	Matairesinol	7.365933	357.136	48766.14844	[M-H]-	C20H22O6	Dibenzylbutyrolactone lignans	MATGKVZWFZHCLI-UHFFFAOYNA-N	COC1=C(O)C=CC(CC2COC(=O)C2CC2=CC(OC)=C(O)C=C2)=C1	81.1	356.90933:43 356.91733:43 356.93866:43 356.95734:43 356.96799:43 356.97064:43 356.97333:43 356.97867:43 356.98132:43 356.99197:43 357.01331:43 357.02664:43 357.03998:43 357.05331:85 357.05862:85 357.06131:43 357.07465:43 357.0853:43 357.09064:128 357.09329:128 357.09598:85 357.09863:43 357.10129:87 357.10397:43 357.11462:174 357.11731:43 357.11996:85 357.12262:43 357.12531:213 357.12796:218 357.1…	123.05839:126 123.07248:126 191.12611:126 203.09001:126 211.16382:126 213.08943:126 243.12808:126 243.13689:126 269.18295:126 269.18756:126 289.11957:126 311.01382:126 311.11337:252 311.11584:126 313.17752:126 313.18253:126 313.1925:126 357.15402:378 357.16205:126 357.19403:126 357.19937:126 357.24203:126 357.31137:126
4282	Palmitic Acid	13.84647	255.2334	182708	[M-H]-	C16H32O2		IPCSVZSSVZVIGE-UHFFFAOYSA-N	O=C(O)CCCCCCCCCCCCCCC	86.4	254.76474:54 254.79402:54 254.80302:108 254.90665:54 254.92693:54 255.04634:108 255.06212:54 255.07112:111 255.07788:54 255.08014:54 255.0824:111 255.08916:110 255.09818:54 255.14099:110 255.14549:54 255.15451:54 255.16127:110 255.16579:54 255.17479:54 255.18156:54 255.19057:54 255.19283:111 255.21312:221 255.21536:110 255.22214:57 255.22438:110 255.22664:667 255.2289:1177 255.23114:3906 255.2334…	114.95224:257 254.46497:257 255.24435:132 255.24661:254 255.24887:130 255.25337:134 255.25563:1226 255.25789:676 255.26015:270 255.26239:689 255.26465:1063 255.26691:262 255.26917:129 255.27141:789 255.27367:394 255.2917:129 256.06558:140 256.7095:126 620.74957:132
Title: The name of the substance in the sample; RT(min): retention time of the measured substance; Precursor m/z: m/z values; Area: peak Area of the substance in the sample; Adduct ion name: The addition ion form of the measured substance; Formula: molecular Formula; Ontology: Class of matter; InChIKey: InChIKey structure; SMILES: SMILES structure; MS1 Isotopes: First-order molecular weight infor…
